# Supplementary material for: Octanuclear [NiII4LnIII4] complexes. Synthesis, crystal structures and magnetocaloric properties
Source: Royal Society of Chemistry journal article supplement (doi:10.1039/c4dt00515e), 2014-01-01
Supplement: c4dt00515e1.pdf [file c4dt00515e1.pdf]

## SUPPORTING INFORMATION

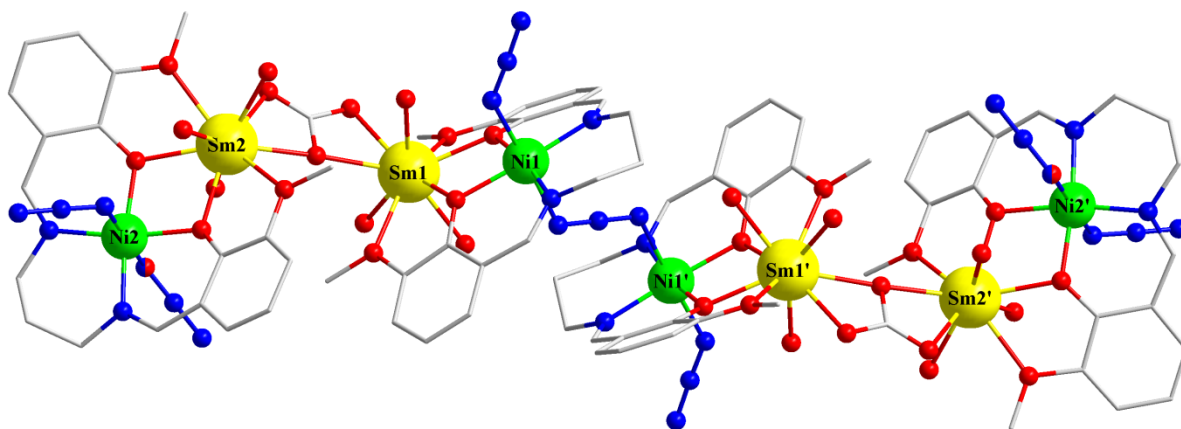

**Figure S1.** View of the octanuclear cationic species

$[(\text{N}_3)_{1.5}(\text{H}_2\text{O})_{0.5}\text{Ni}(\text{valpn})\text{Sm}(\text{H}_2\text{O})_3(\mu\text{-CO}_3)\text{Sm}(\text{H}_2\text{O})_3(\text{valpn})\text{Ni}(\text{N}_3)(\mu_{1,3}\text{-N}_3)_{0.5}]_2^+$  in **1** (' = -x, 2-y, 1-z)

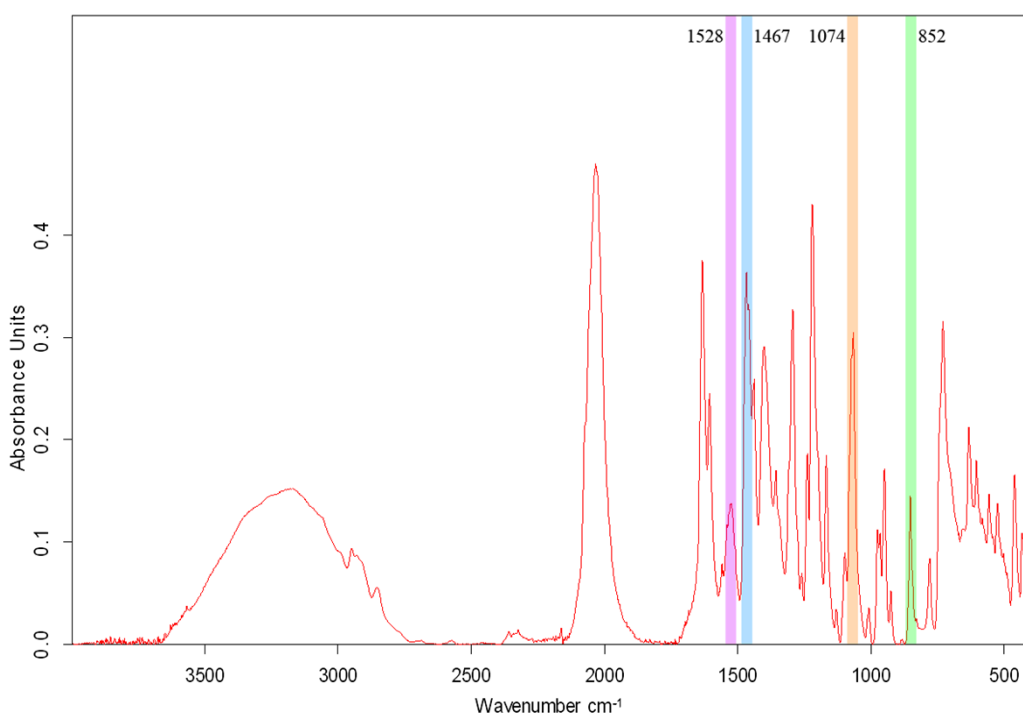

**Figure S2.** The infrared spectrum of **2**
